# Supplementary material
Source: Springer Nature journal article supplement (https://www.springermedizin.de/resource/supplementary/13223_2013_401_MOESM4_ESM.pdf/9597834)

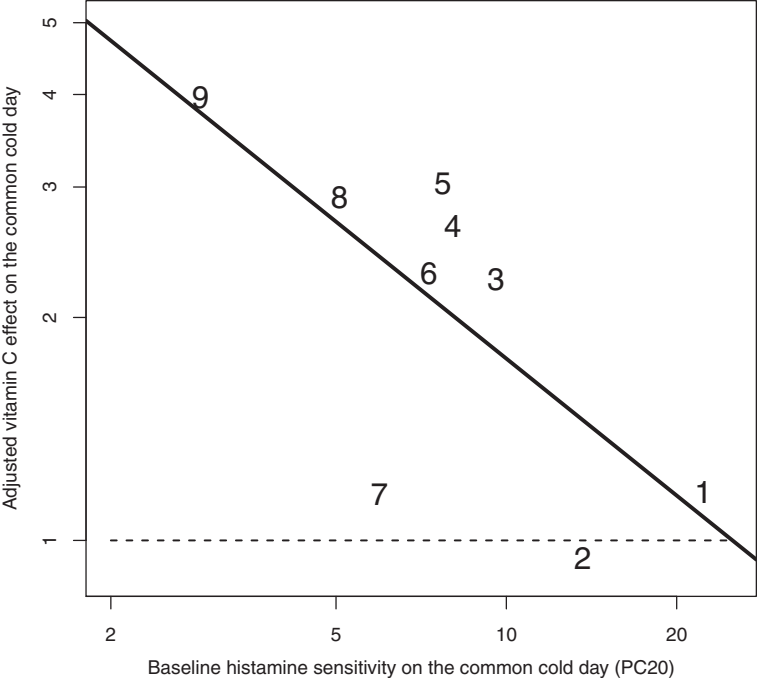

Supplement: MOESM4 [file 9597834]
